# Supplementary material for: Crystal structure and physical stability of ginsenoside compound-K solvates
Source: Royal Society of Chemistry journal article supplement (doi:10.1039/c9ce00965e), 2019-01-01
Supplement: c9ce00965e1.pdf [file c9ce00965e1.pdf]

## Supplementary information

### Crystal Structure and Physical Stability of Ginsenoside Compound-K

#### Solvates

Jinyao Chen,<sup>a</sup> Wenming Zhu,<sup>b</sup> Weijie Ji,<sup>a</sup> Bin Zhu,<sup>a</sup> Chunyang Guo,<sup>a</sup> Minghui Qi,<sup>\*a</sup> Guobin Ren<sup>\*a</sup>

1. Tables
2. Figures

Table S1. Hydrogen bonds between solvent and GCK molecule in solvates

| Donor-H...Acceptor                                   | D-H (Å)  | H...A (Å) | D...A (Å) | $\angle$ D-H...A<br>( $^{\circ}$ ) | Symmetry codes    |
|------------------------------------------------------|----------|-----------|-----------|------------------------------------|-------------------|
| HH                                                   |          |           |           |                                    |                   |
| O <sub>8A</sub> -H <sub>8A</sub> ...O <sub>9</sub>   | 0.94(4)  | 1.98(5)   | 2.859(4)  | 157(4)                             | 1-x, 1/2+y, 1-z   |
| O <sub>9</sub> -H <sub>9C</sub> ...O <sub>5A</sub>   | 0.73(8)  | 2.06(8)   | 2.781(4)  | 172(6)                             | x, y, z           |
| O <sub>9</sub> -H <sub>9B</sub> ...O <sub>2A</sub>   | 0.95(9)  | 2.25(9)   | 3.186(4)  | 171(7)                             | 1-x, -1/2+y, 1-z  |
| MH                                                   |          |           |           |                                    |                   |
| O <sub>4</sub> -H <sub>4</sub> ...O <sub>9</sub>     | 0.84     | 2.06      | 2.868(3)  | 162                                | x, y, z           |
| O <sub>8</sub> -H <sub>8</sub> ...O <sub>9</sub>     | 0.79(5)  | 2.14(5)   | 2.895(4)  | 161(4)                             | x, 1+y, z         |
| O <sub>9</sub> -H <sub>9A</sub> ...O <sub>2</sub>    | 0.87     | 1.93      | 2.763(3)  | 160                                | 2-x, -1/2+y, 2-z  |
| S <sub>Et</sub>                                      |          |           |           |                                    |                   |
| O <sub>4</sub> -H <sub>4</sub> ...O <sub>10</sub>    | 0.82(8)  | 2.08(8)   | 2.870(7)  | 162(6)                             | x, y, z           |
| O <sub>5</sub> -H <sub>5</sub> ...O <sub>9</sub>     | 0.84     | 2.08      | 2.880(7)  | 159                                | x, y, z           |
| O <sub>10</sub> -H <sub>10</sub> ...O <sub>1</sub>   | 0.84     | 2.00      | 2.824(7)  | 167                                | 1-x, 1/2+y, 1-z   |
| O <sub>9</sub> -H <sub>9B</sub> ...O <sub>8A</sub>   | 0.84     | 2.39      | 2.899 (7) | 119                                | 1-x, 1/2+y, 2-z   |
| S <sub>MeW</sub>                                     |          |           |           |                                    |                   |
| O <sub>4</sub> -H <sub>4</sub> ...O <sub>11</sub>    | 0.83(3)  | 1.98(3)   | 2.802(3)  | 174(3)                             | x, y, z           |
| O <sub>6</sub> -H <sub>6</sub> ...O <sub>10</sub>    | 0.84     | 1.94      | 2.746(3)  | 159                                | -x, -1/2+y, -1-z  |
| O <sub>11</sub> -H <sub>11C</sub> ...O <sub>1</sub>  | 0.90(5)  | 1.98(5)   | 2.849(3)  | 163(4)                             | x, -1+y, z        |
| O <sub>8</sub> -H <sub>8</sub> ...O <sub>10</sub>    | 0.84     | 2.02      | 2.807(3)  | 155                                | x, y, z           |
| O <sub>9</sub> -H <sub>9A</sub> ...O <sub>4</sub>    | 0.84     | 2.00      | 2.829(3)  | 169                                | x, y, z           |
| O <sub>10</sub> -H <sub>10A</sub> ...O <sub>2</sub>  | 0.84     | 1.82      | 2.659(3)  | 177                                | x, y, z           |
| O <sub>11</sub> -H <sub>11D</sub> ...O <sub>9</sub>  | 0.81(5)  | 2.08(5)   | 2.868(3)  | 166(5)                             | -1-x, 1/2+y, -1-z |
| S <sub>EtW</sub>                                     |          |           |           |                                    |                   |
| O <sub>4</sub> -H <sub>4</sub> ...O <sub>11</sub>    | 0.84     | 1.98      | 2.815(3)  | 170                                | -1+x, y, z        |
| O <sub>6</sub> -H <sub>6</sub> ...O <sub>9</sub>     | 0.84     | 2.01      | 2.819(3)  | 160                                | 1-x, -1/2+y, -z   |
| O <sub>8</sub> -H <sub>8</sub> ...O <sub>9</sub>     | 0.84     | 2.05      | 2.819(3)  | 153                                | x, y, z           |
| O <sub>9</sub> -H <sub>9A</sub> ...O <sub>2</sub>    | 0.84     | 1.88      | 2.706(3)  | 169                                | x, y, z           |
| O <sub>10</sub> -H <sub>10</sub> ...O <sub>4</sub>   | 0.78(7)  | 2.12(7)   | 2.885(3)  | 167(6)                             | 1-x, 1/2+y, 1-z   |
| O <sub>11</sub> -H <sub>11C</sub> ...O <sub>1</sub>  | 0.85     | 2.07      | 2.911 (3) | 171                                | 1+x, -1+y, z      |
| O <sub>11</sub> -H <sub>11D</sub> ...O <sub>10</sub> | 0.80(5)  | 2.08(5)   | 2.869(4)  | 168(5)                             | x, y, -1+z        |
| S <sub>iPrW</sub>                                    |          |           |           |                                    |                   |
| O <sub>4</sub> -H <sub>4</sub> ...O <sub>10</sub>    | 0.76(6)  | 2.05(6)   | 2.795(4)  | 170(5)                             | x, y, z           |
| O <sub>6</sub> -H <sub>6</sub> ...O <sub>9</sub>     | 0.71(4)  | 2.05(4)   | 2.746(4)  | 166(4)                             | 2-x, -1/2+y, 1-z  |
| O <sub>8</sub> -H <sub>8</sub> ...O <sub>9</sub>     | 0.80(5)  | 2.04(5)   | 2.817(4)  | 163(4)                             | x, y, z           |
| O <sub>9</sub> -H <sub>9A</sub> ...O <sub>2</sub>    | 0.84(6)  | 1.86(6)   | 2.687(4)  | 170(6)                             | x, y, z           |
| O <sub>10</sub> -H <sub>10B</sub> ...O <sub>11</sub> | 0.86(6)  | 2.06(5)   | 2.894(5)  | 163(5)                             | 1-x, 1/2+y, 1-z   |
| O <sub>10</sub> -H <sub>10A</sub> ...O <sub>1</sub>  | 0.86(6)  | 1.97(6)   | 2.818(5)  | 171(5)                             | x, -1+y, z        |
| O <sub>11</sub> -H <sub>11D</sub> ...O <sub>8</sub>  | 0.90(19) | 2.56(18)  | 3.319(5)  | 142(14)                            | 2-x, -1/2+y, 1-z  |
| O <sub>11</sub> -H <sub>11C</sub> ...O <sub>4</sub>  | 0.81(10) | 2.05(10)  | 2.849(5)  | 172(5)                             | x, y, z           |

Table S2. Relative proportion of the close contact for water molecule in hydrates and

mixed solvates.

---

| Form / contact      | H-O  | O-H  | H-H  |
|---------------------|------|------|------|
| HH                  | 23.9 | 29.3 | 46.8 |
| MH                  | 23.2 | 30.3 | 46.6 |
| S <sub>MeW</sub>    | 20.8 | 30.5 | 48.7 |
| S <sub>EtW</sub>    | 21.5 | 30.1 | 48.4 |
| S <sub>iPrW-1</sub> | 22.1 | 28   | 50.1 |
| S <sub>iPrW-2</sub> | 17.5 | 27.2 | 55.3 |

---

## 2. Figures.

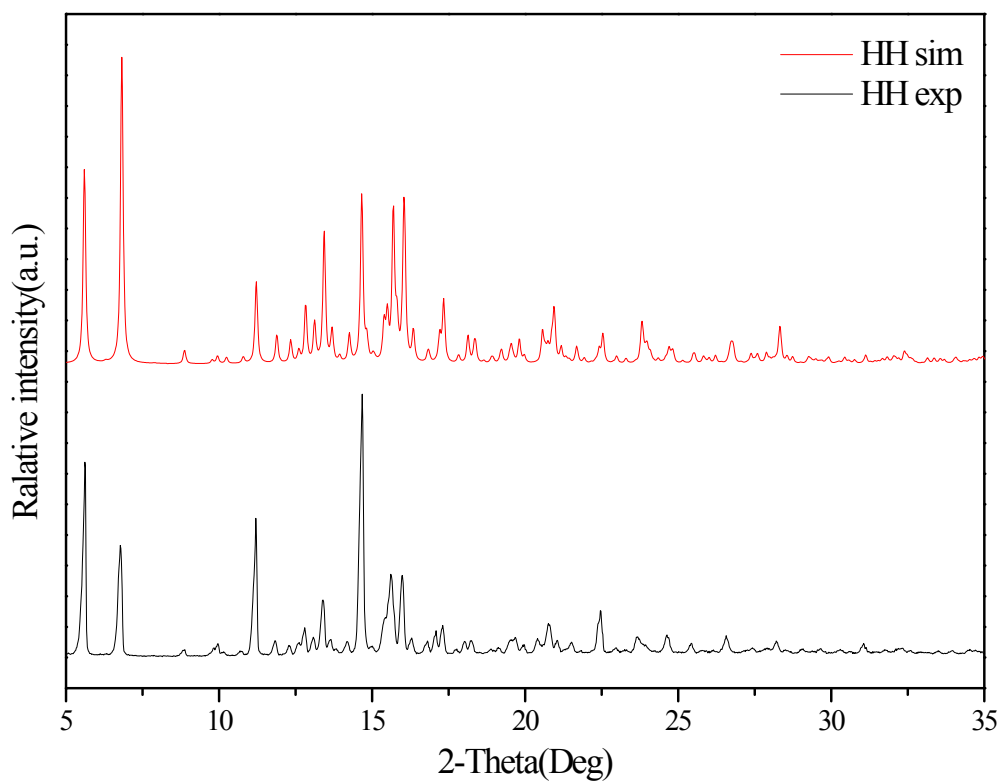

(a)

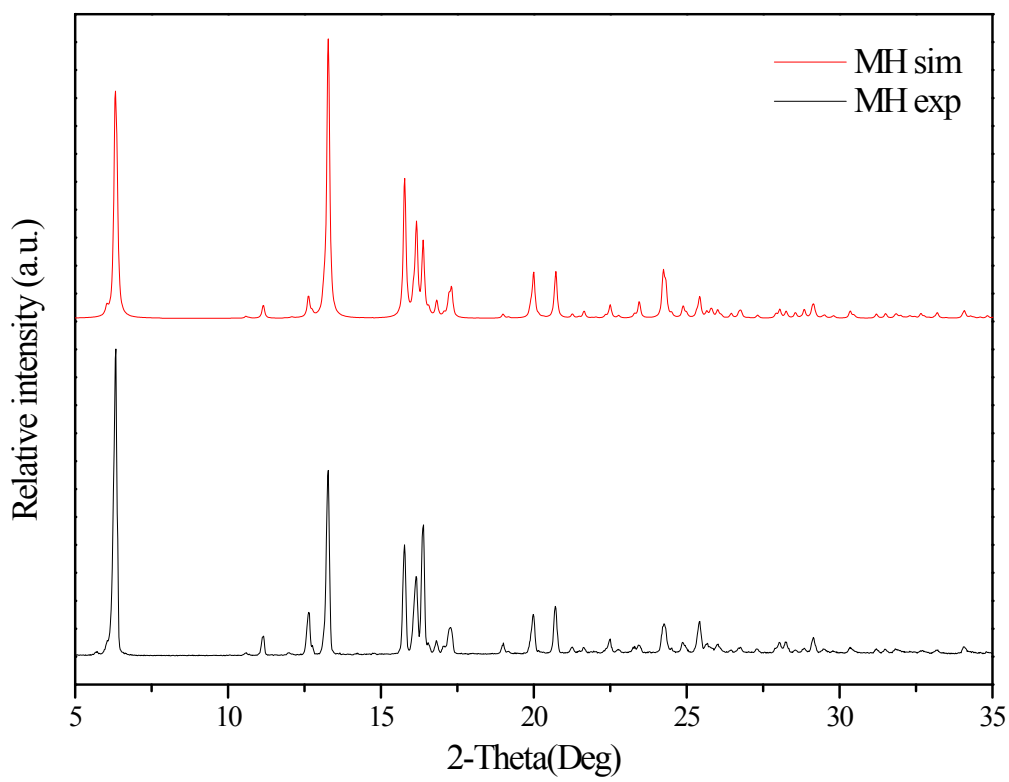

(b)

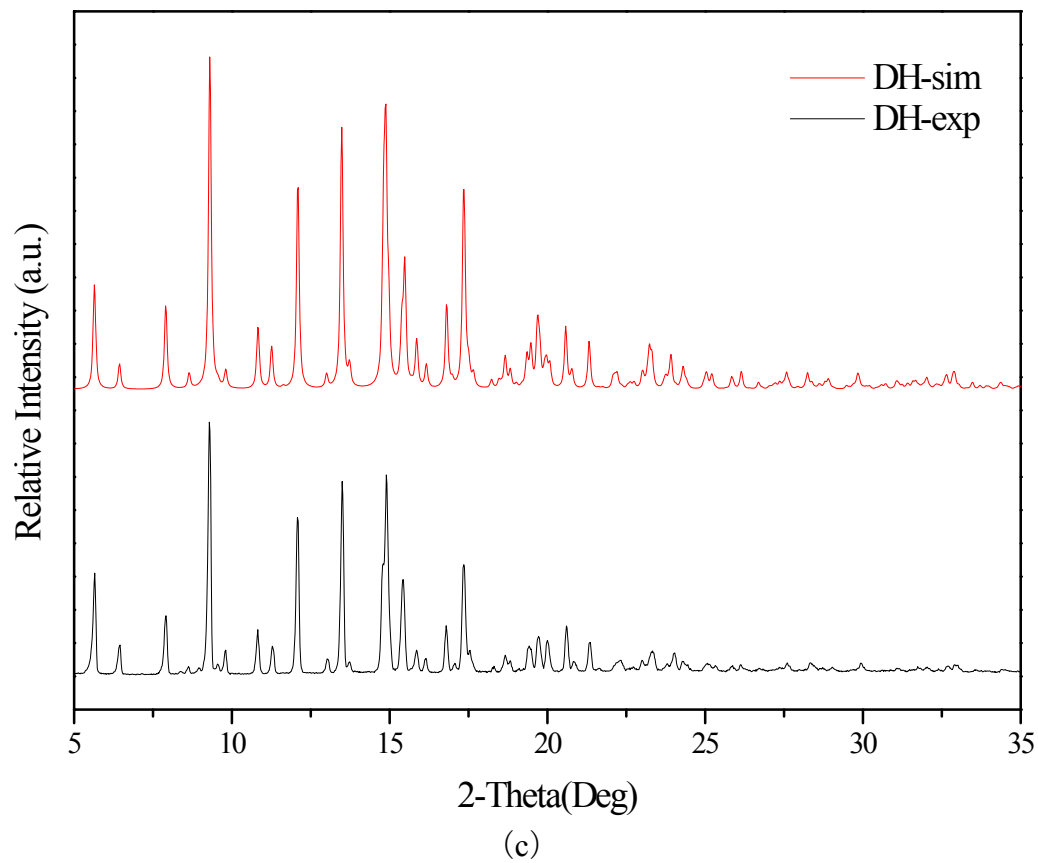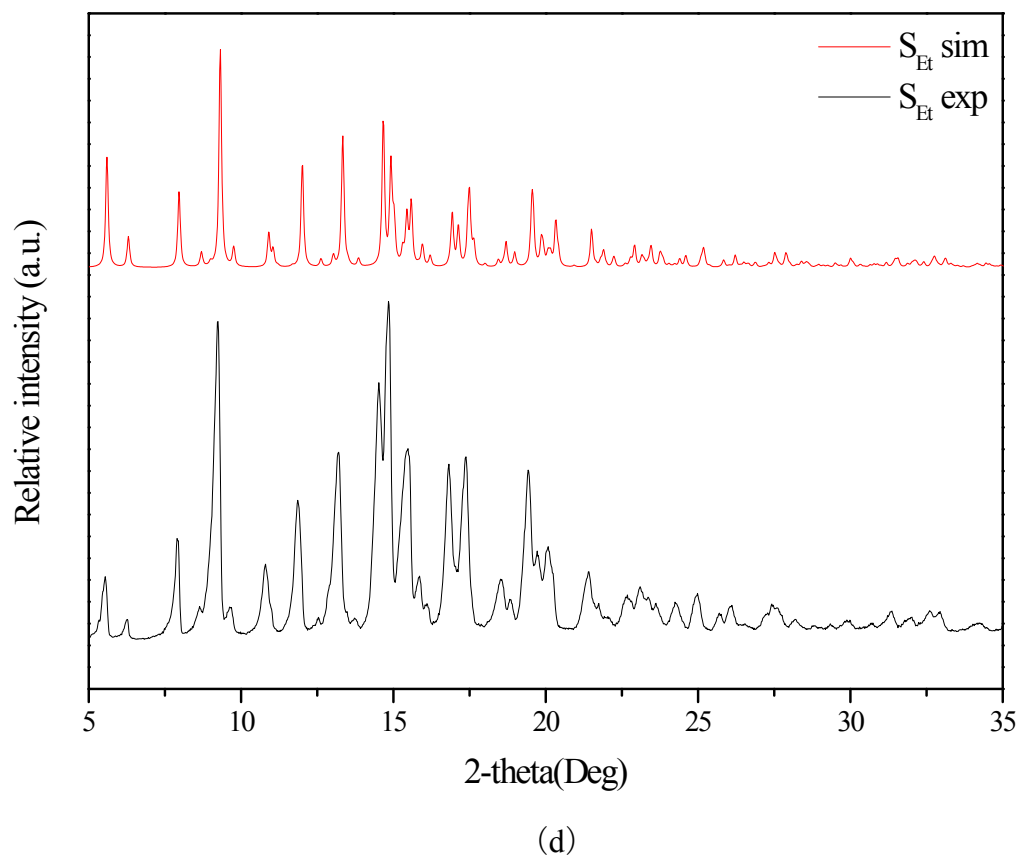

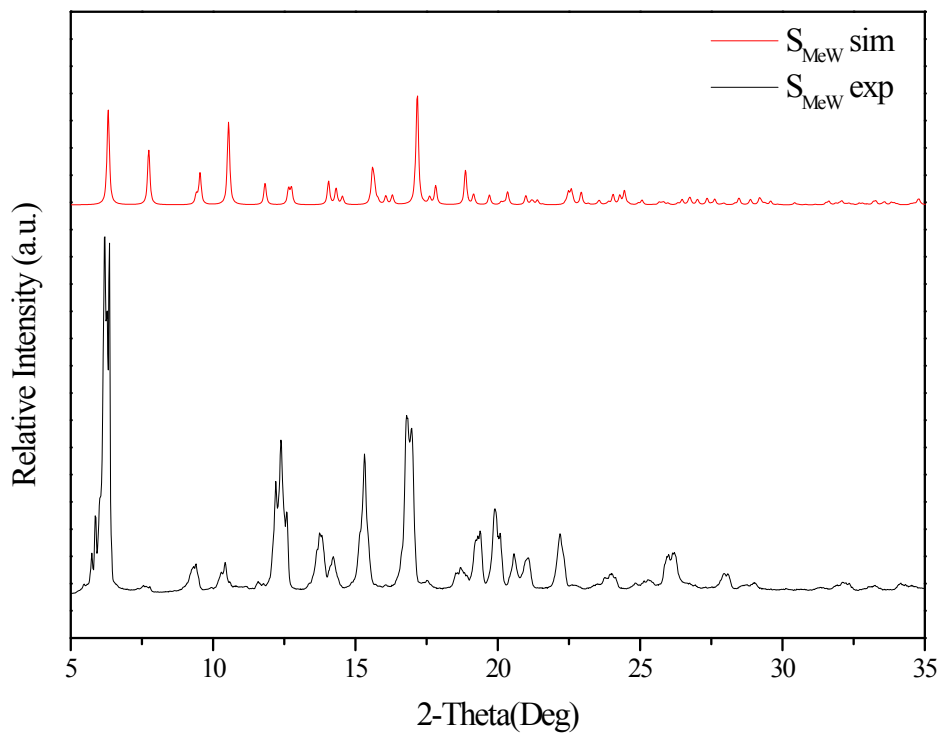

(e)

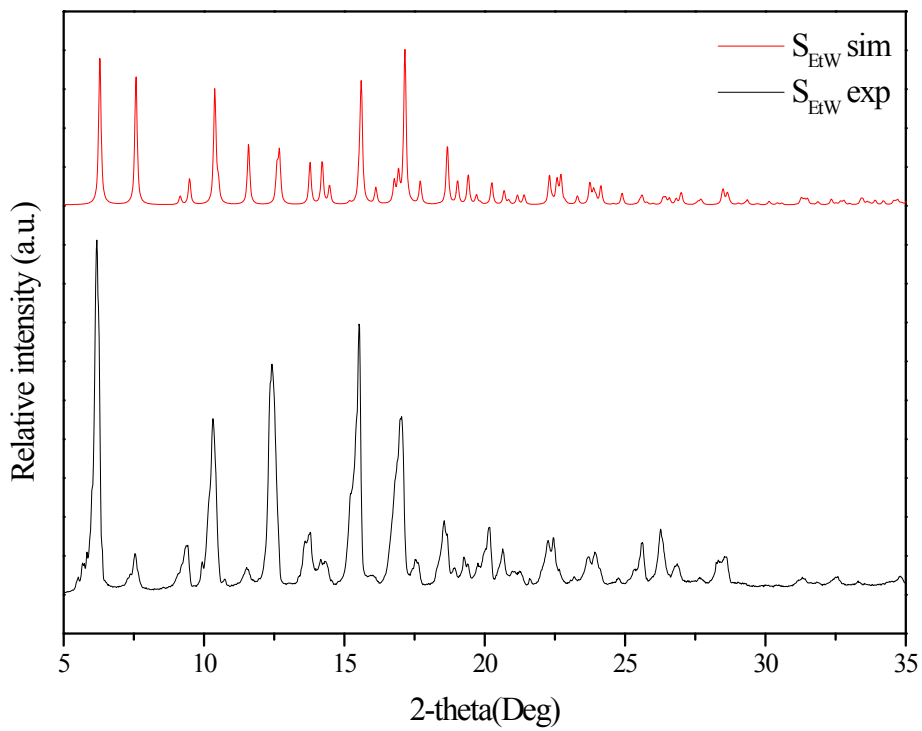

(f)

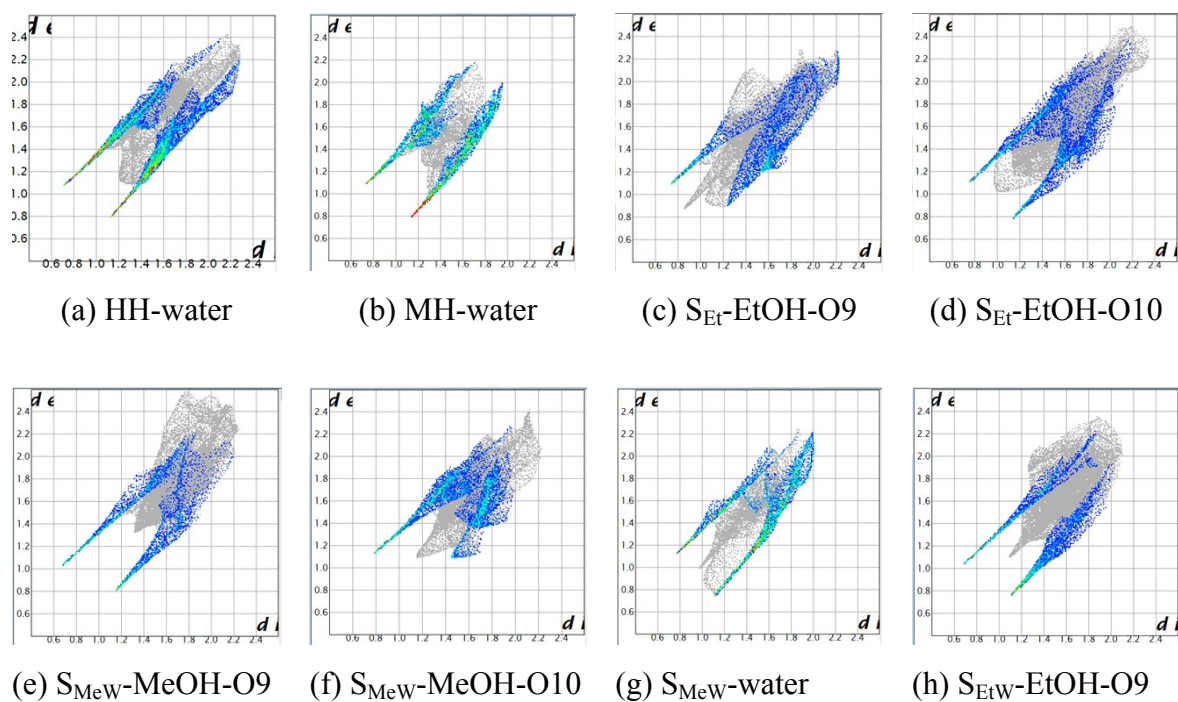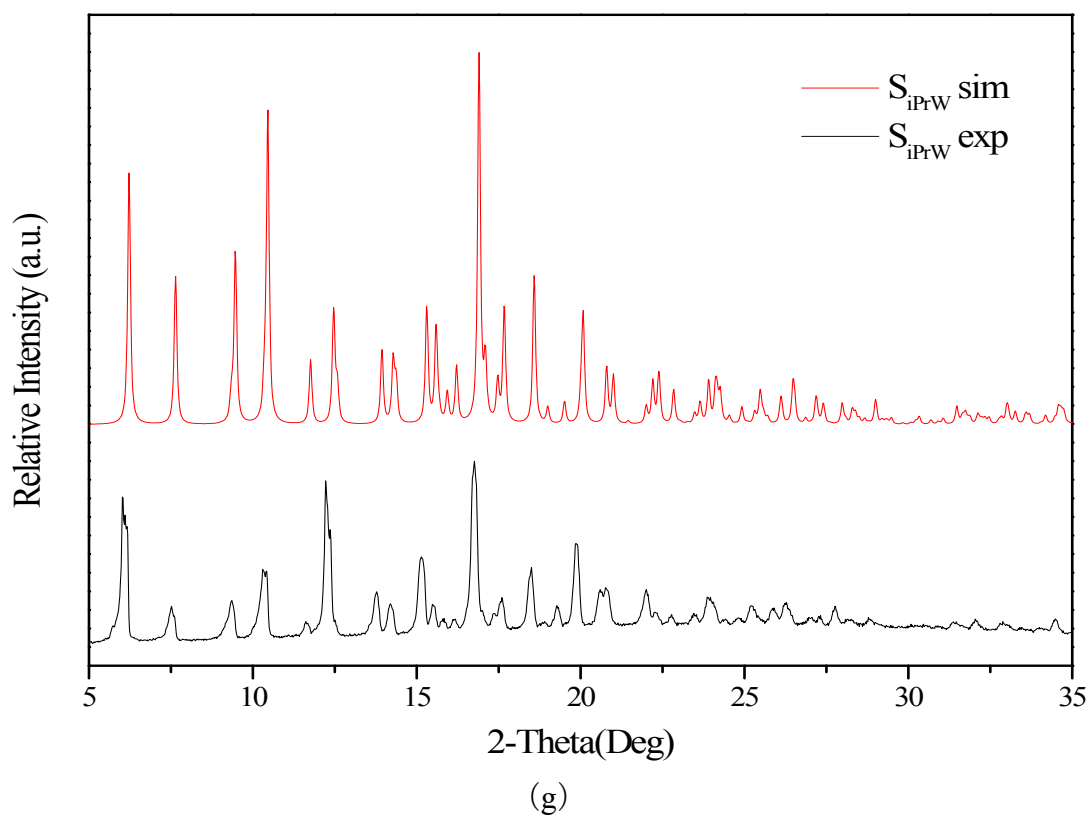

**Figure S1.** The comparison between the powder patterns obtained experimentally and simulated patterns generated from the single-crystal diffraction data.

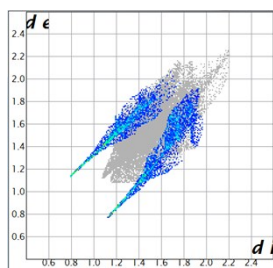

(i)  $S_{EtW}$ -EtOH-O10

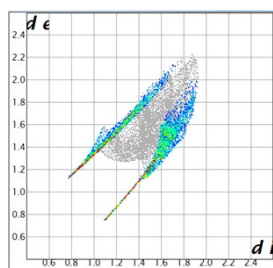

(j)  $S_{EtW}$ -water

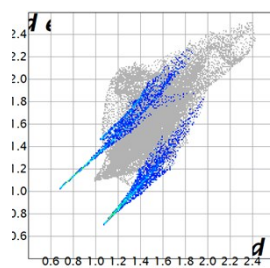

(k)  $S_{iPrW}$ -iPrOH

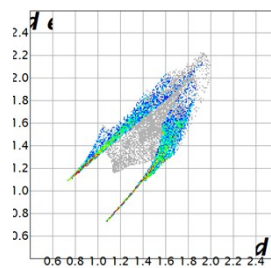

(l)  $S_{iPrW}$ -water-O10

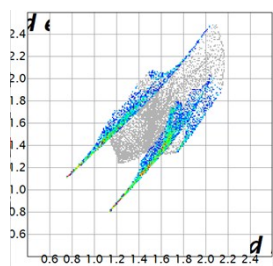

(m)  $S_{iPrW}$ -water-O11

**Figure S2.** The O...H intermolecular contacts of 2D fingerprint plots from Hirshfeld surface analyses of solvent molecules.



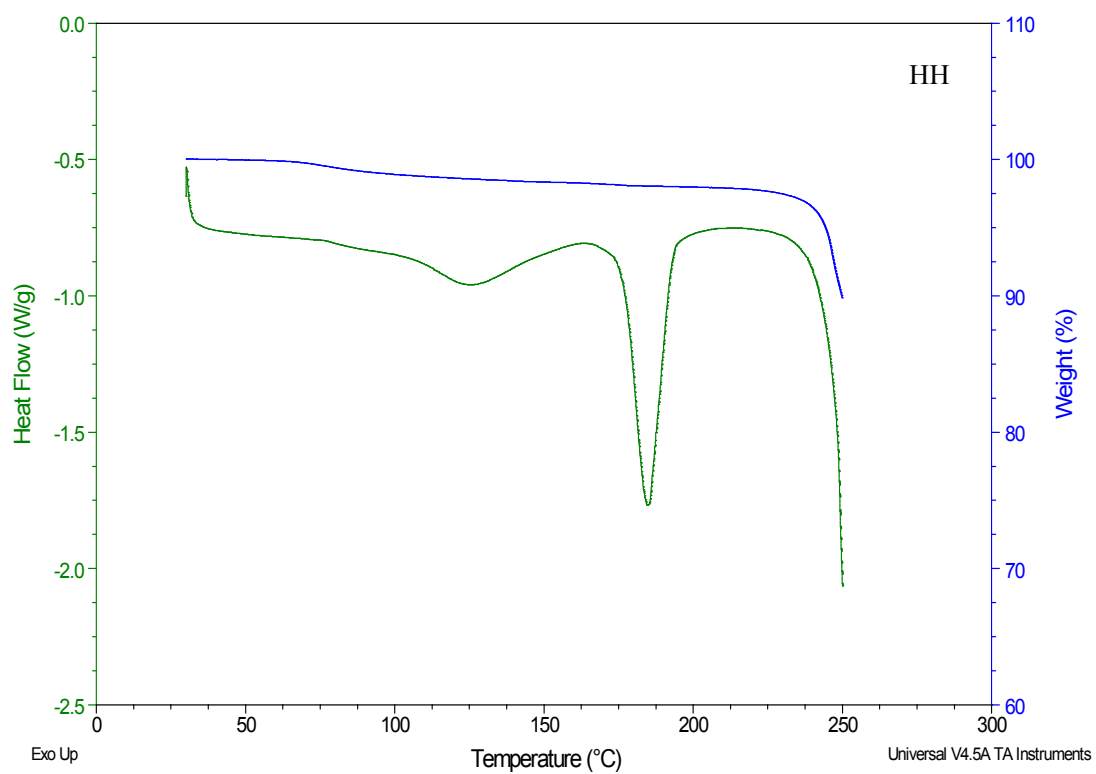

(a)

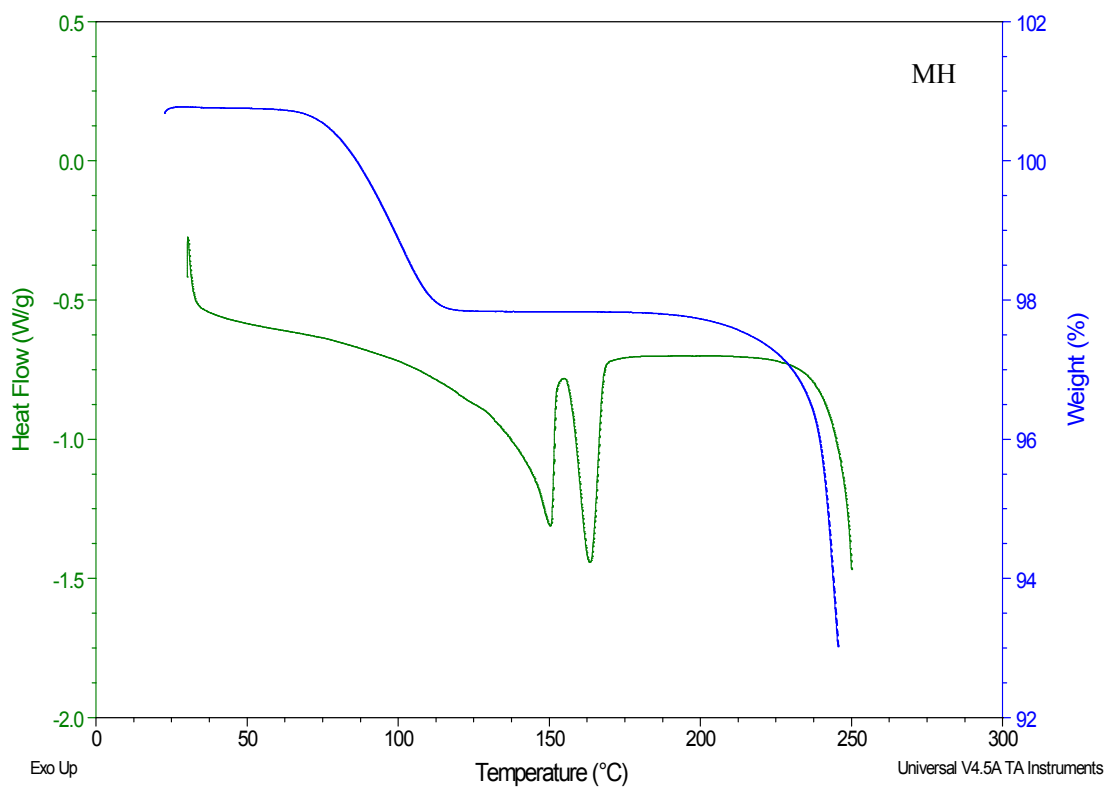

(b)

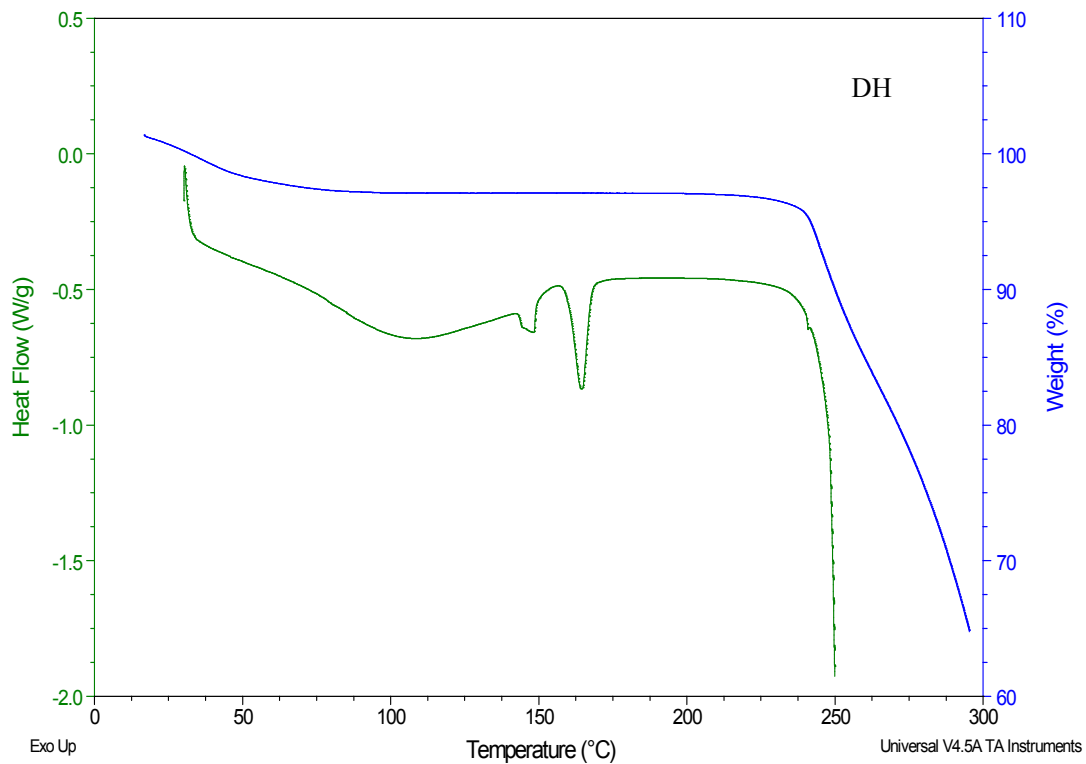

(c)

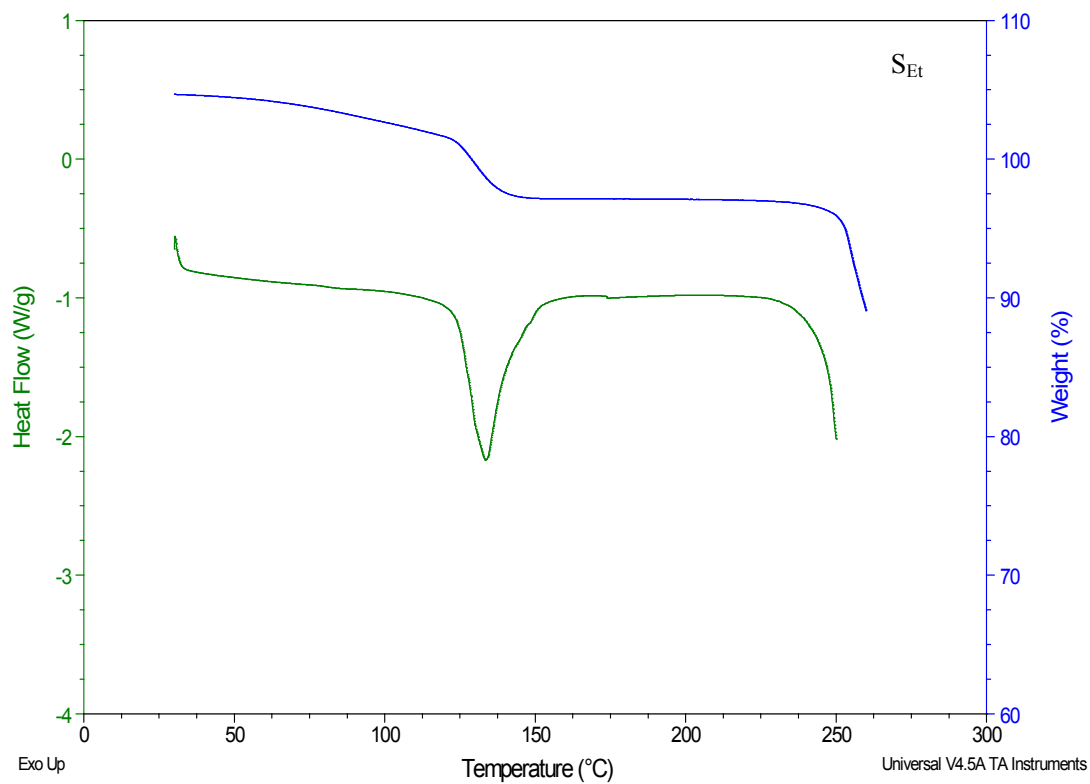

(d)

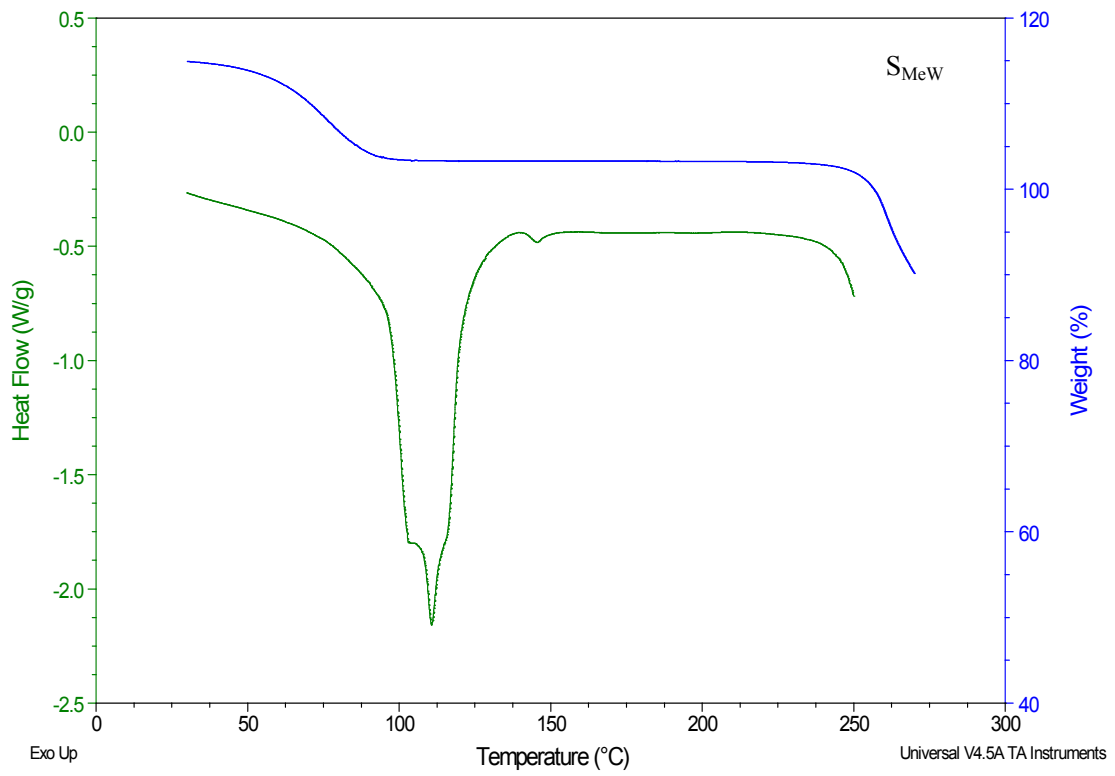

(e)

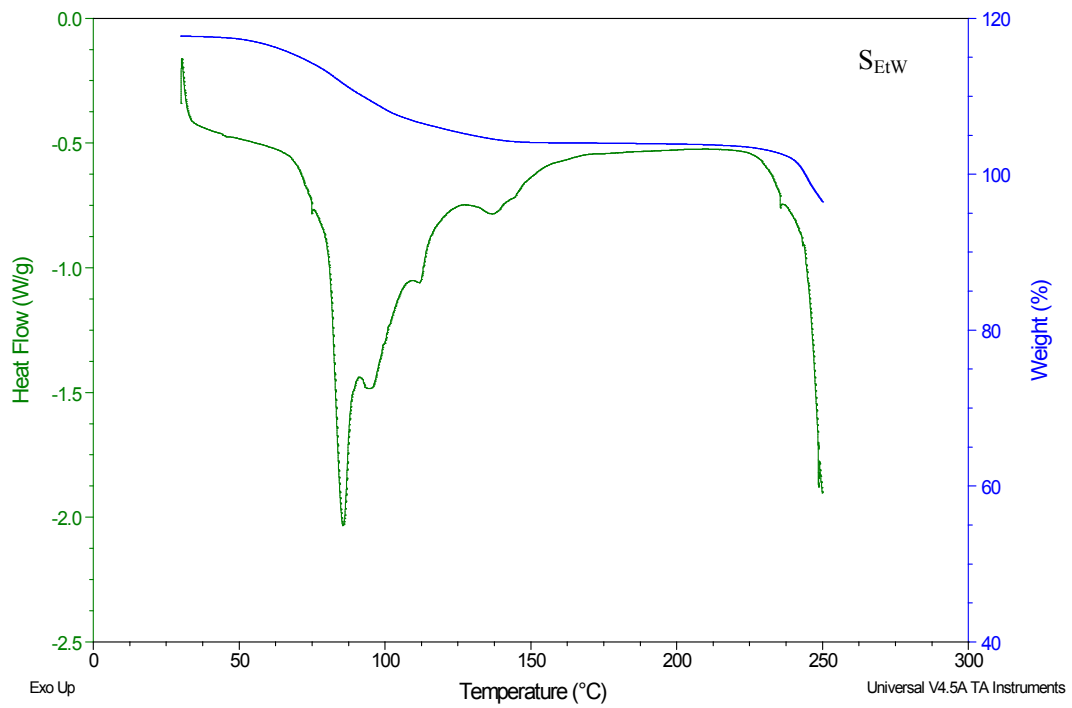

(f)

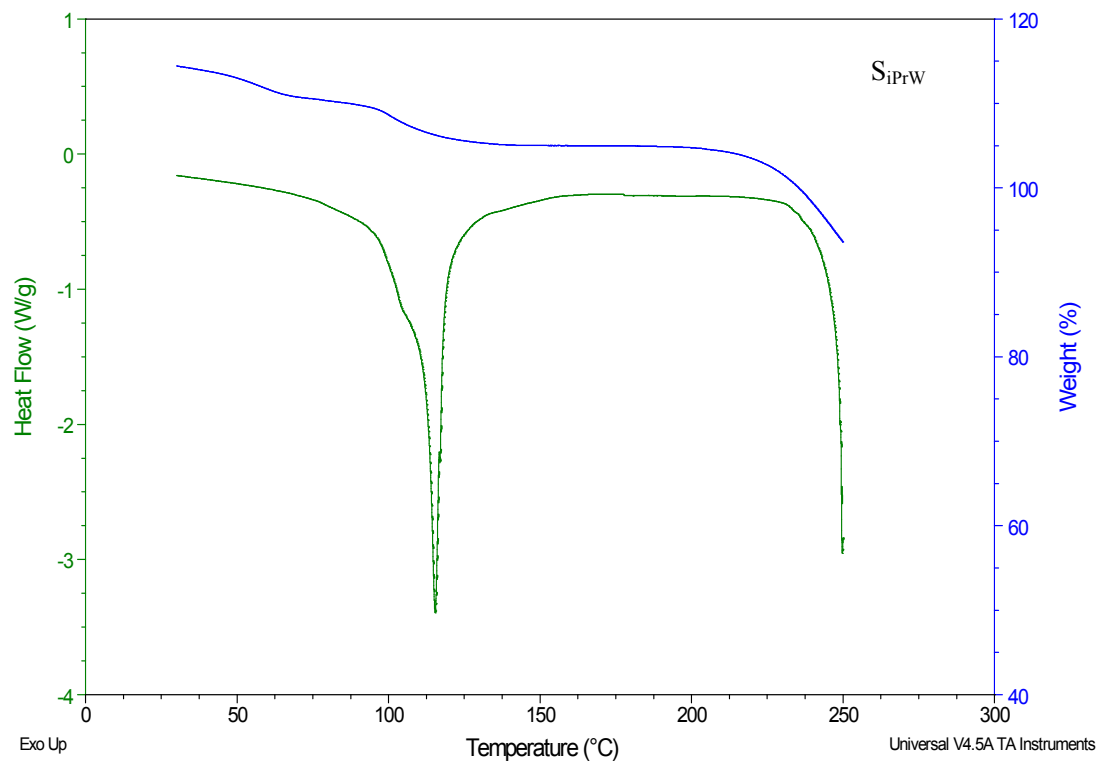

(g)

**Figure S3.** DSC diagrams of all GCK solvates.

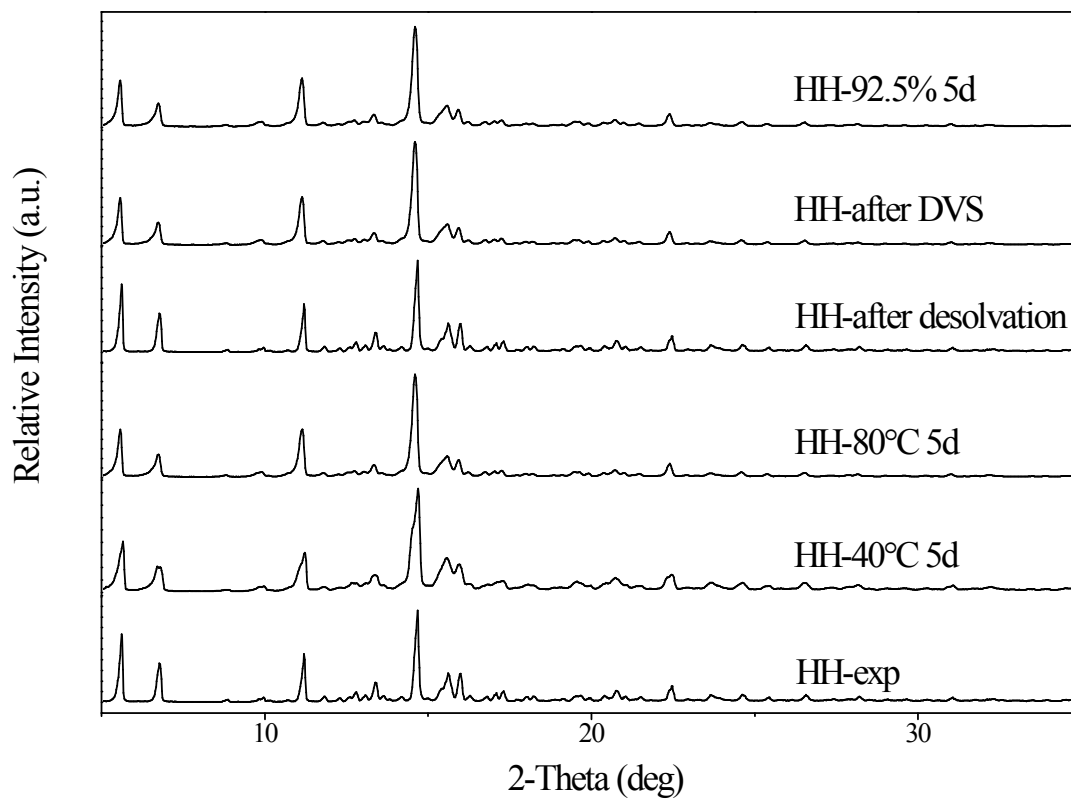

(a)

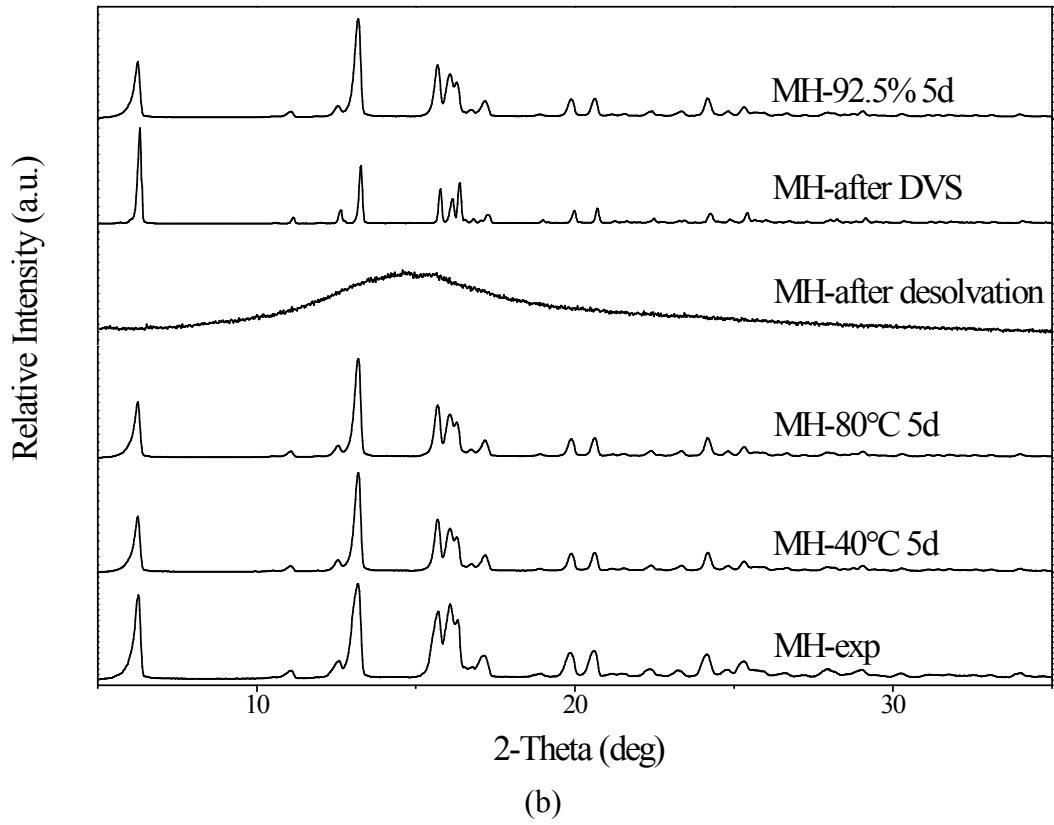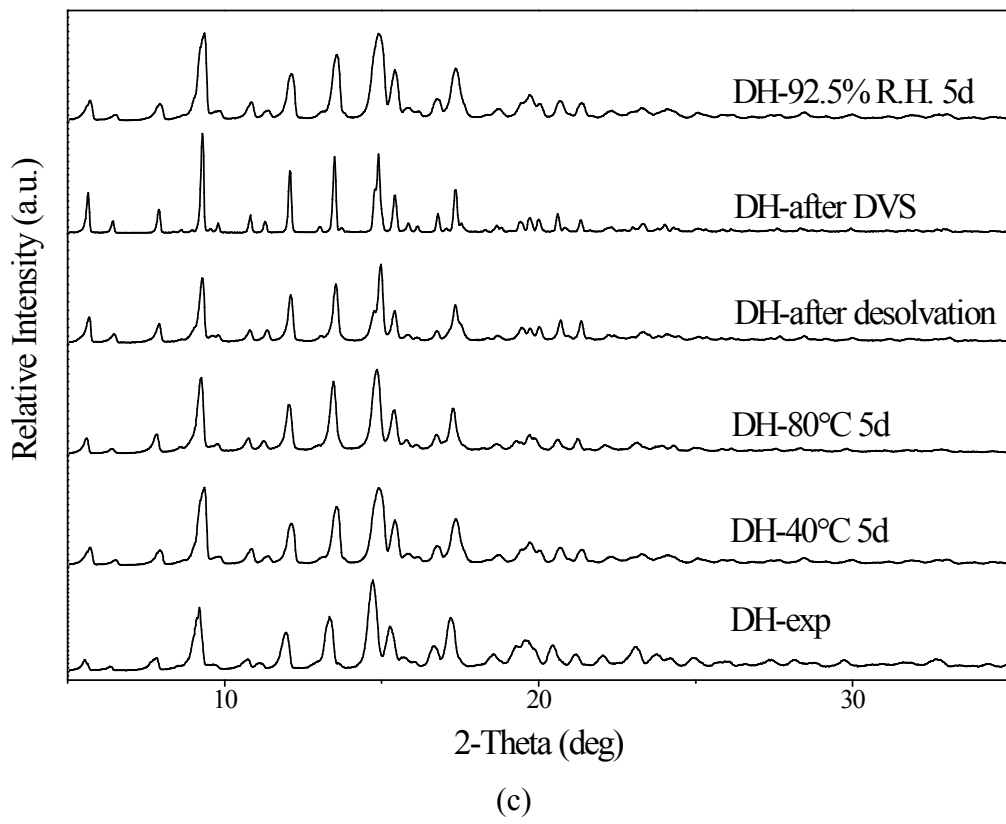

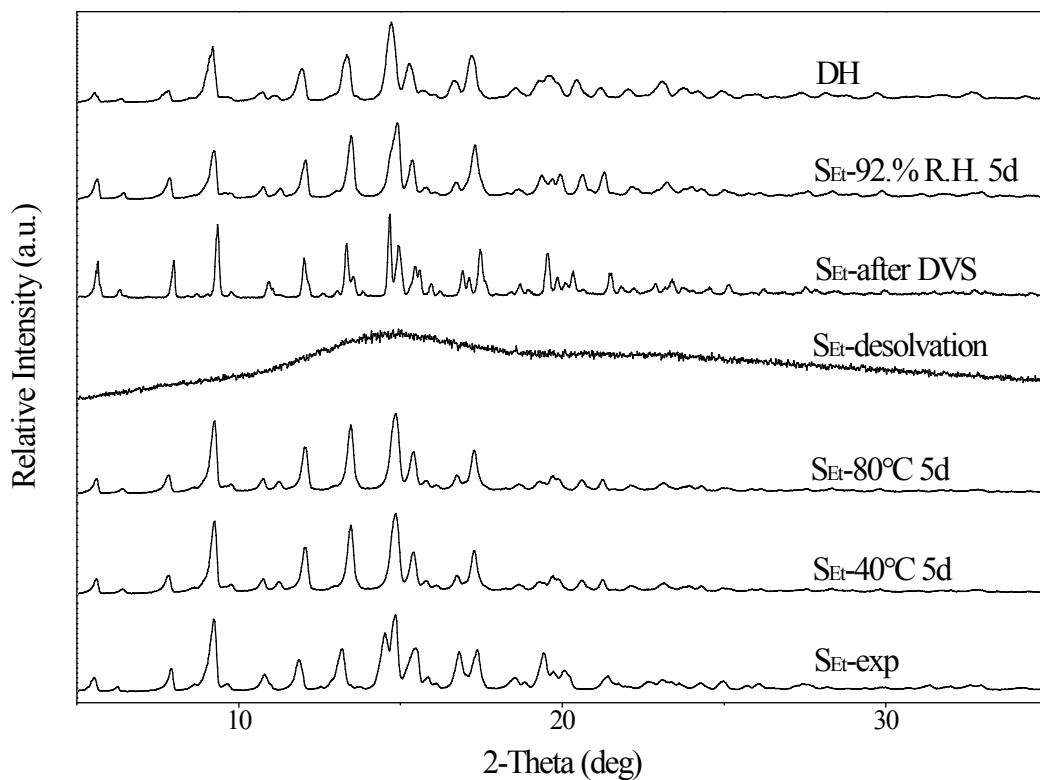

(d)

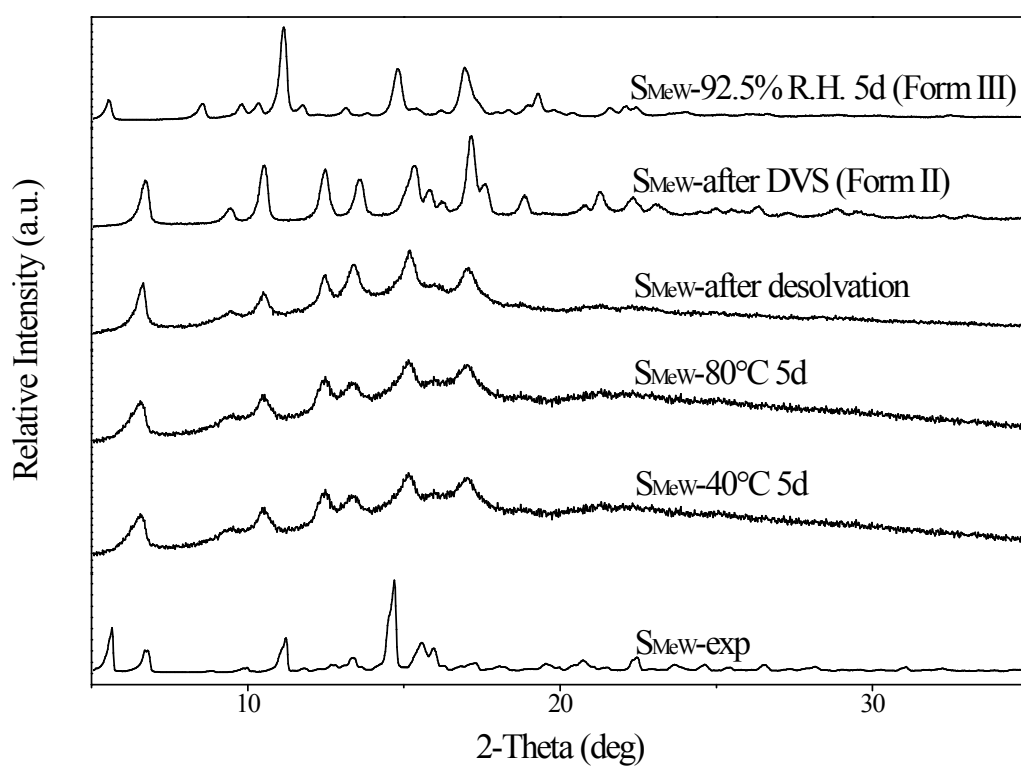

(e)

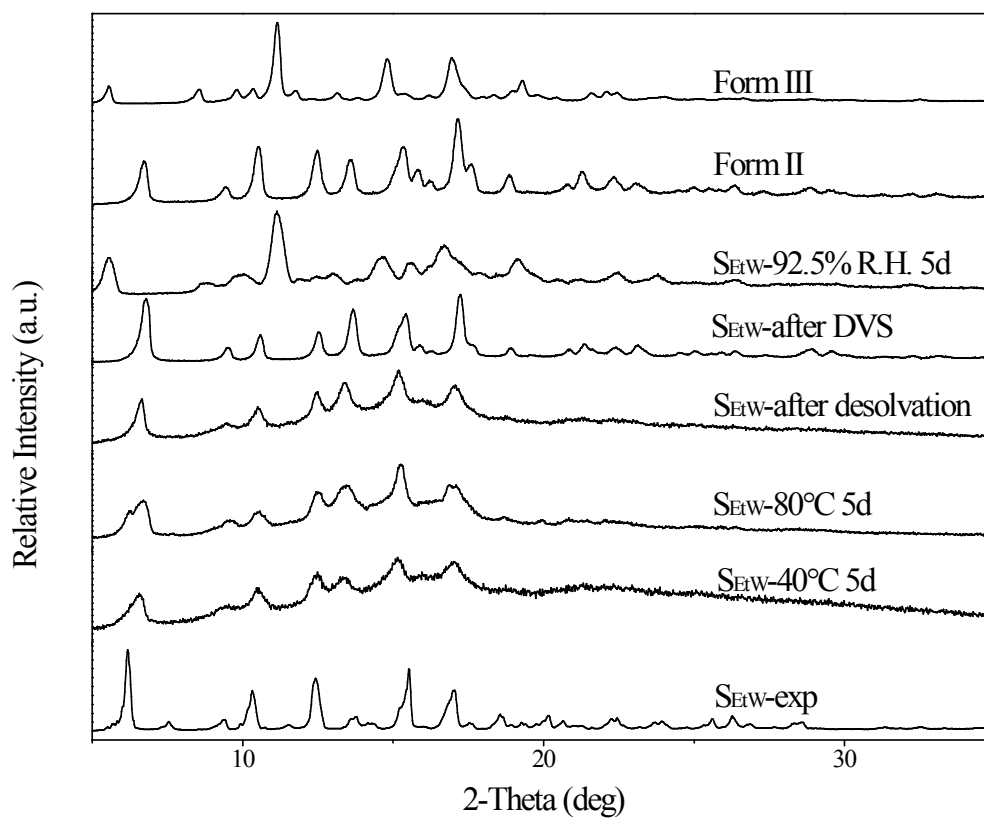

(f)

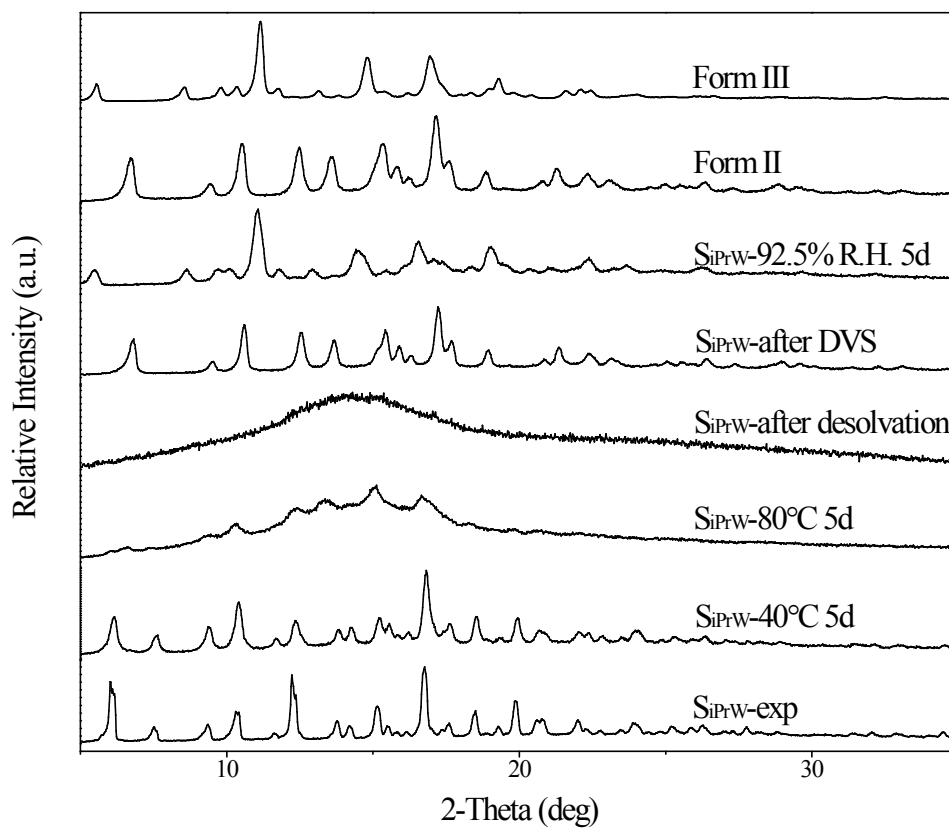

(g)

**Figure S4.** PXRD patterns of the resulting solid after desolvation and DVS experiments for GCK solvates.

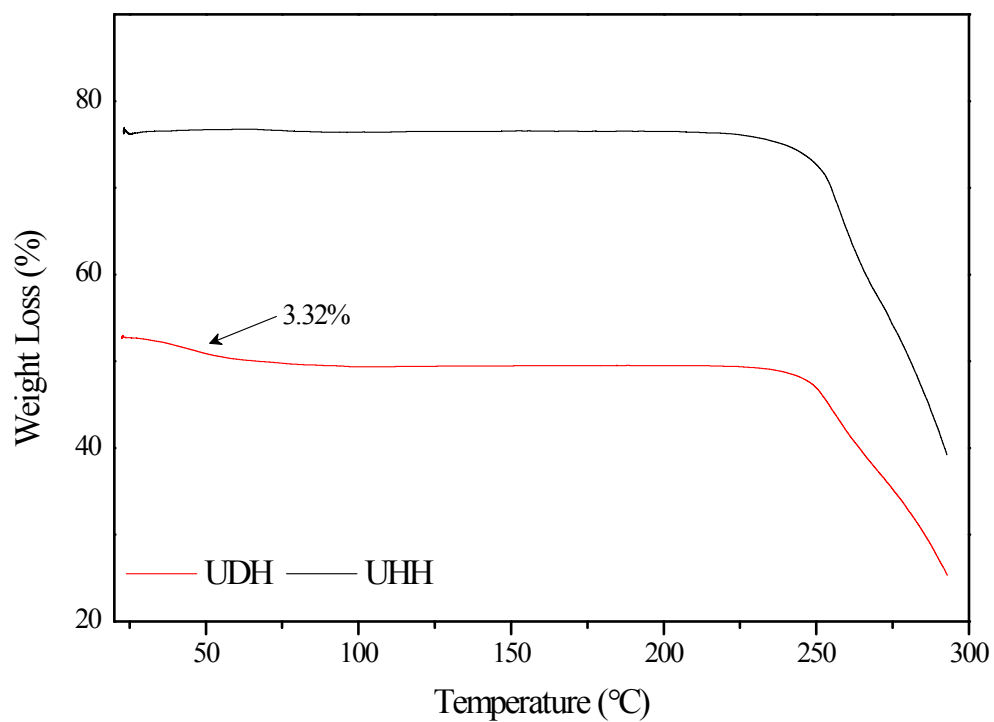

**Figure S5.** TGA cycle curves of UHH and UDH after PXRD performance.

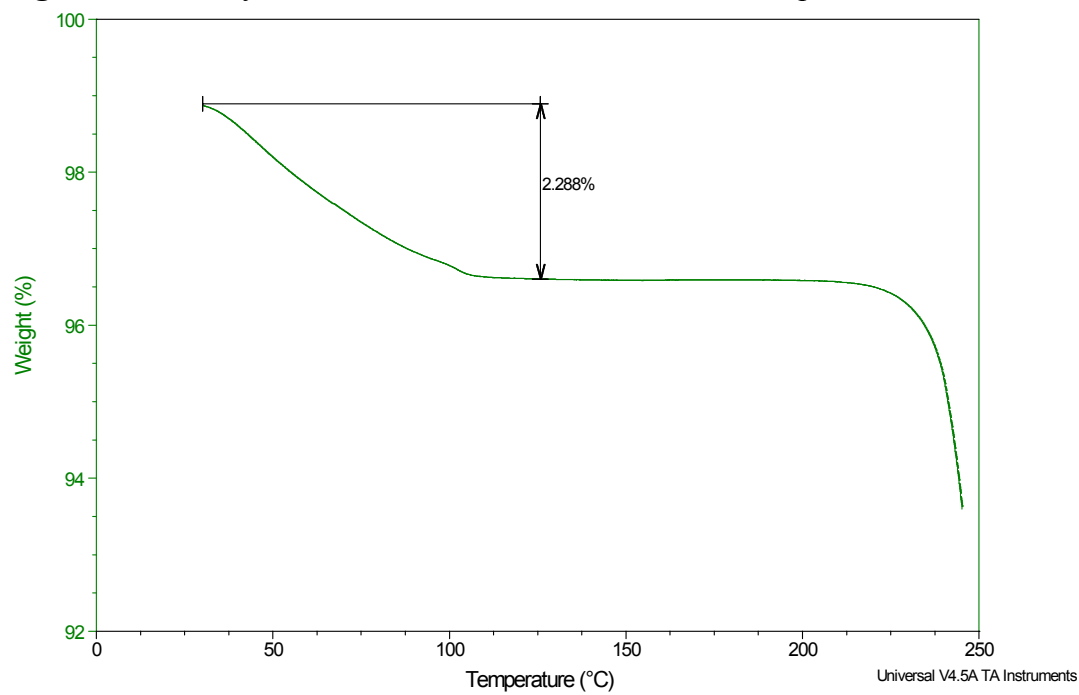

**Figure S6.** TGA curve of the resulting solid after DVS experiments for DH.



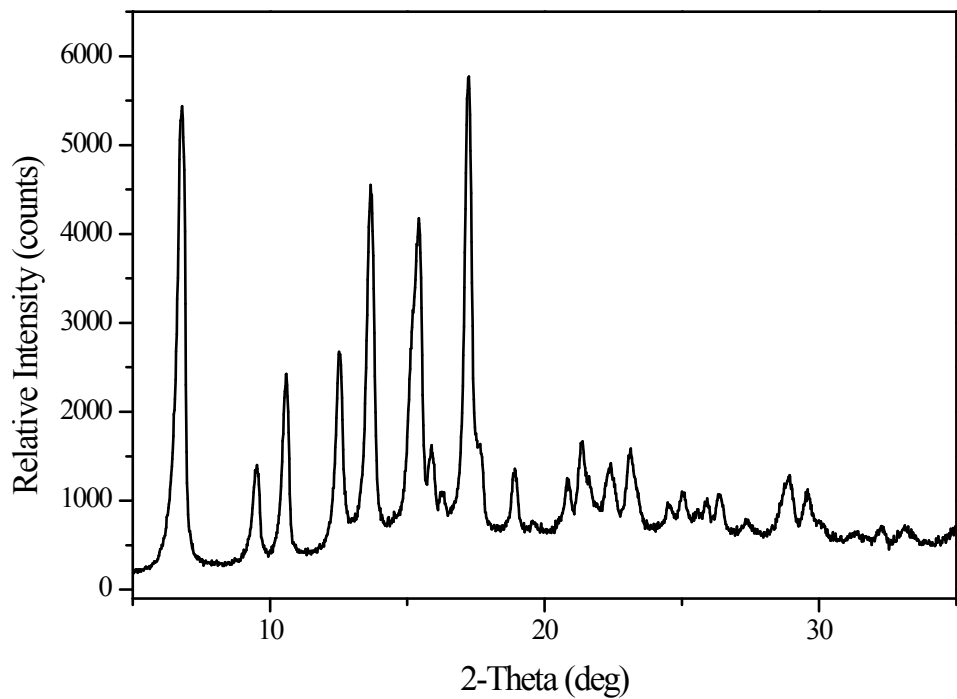

(a)

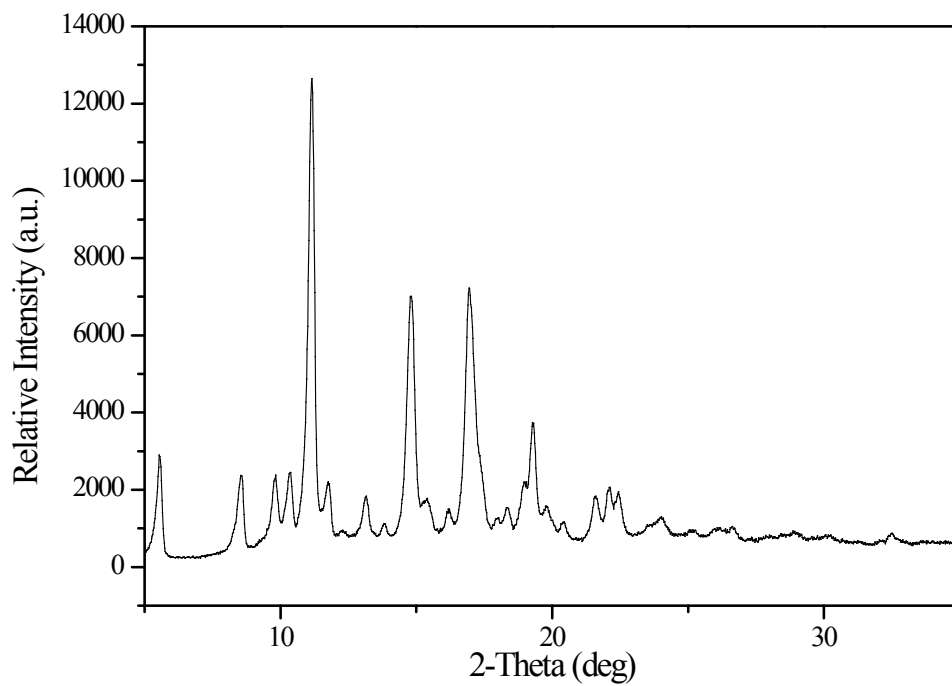

(b)

**Figure S7.** PXRD patterns of form II (a) and form III (b) for GCK compound.

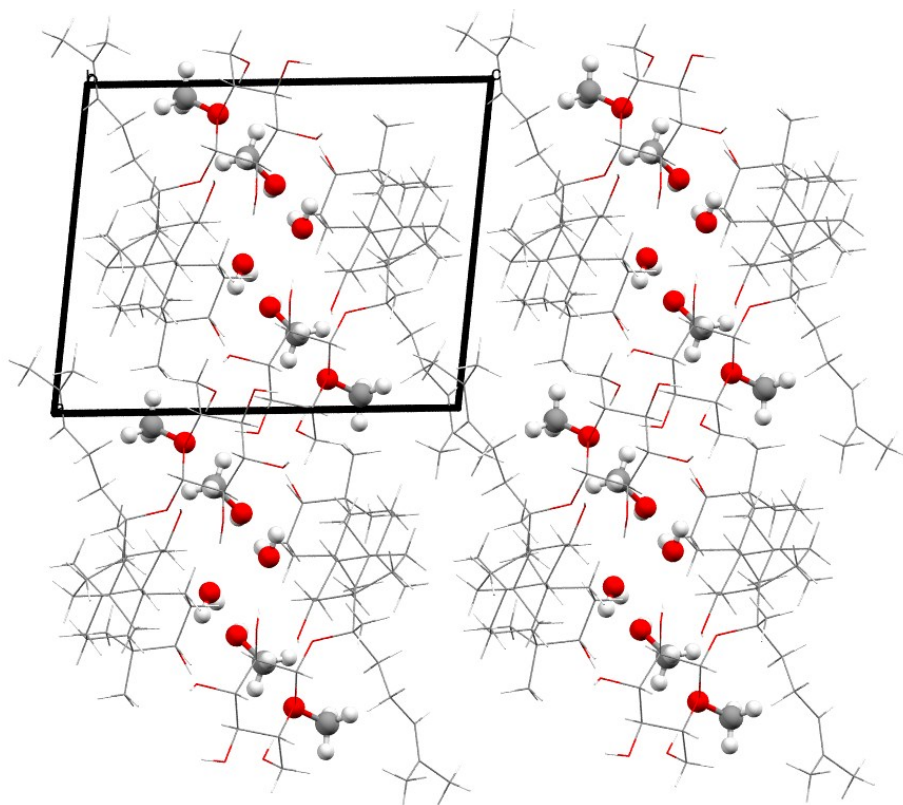

(a)

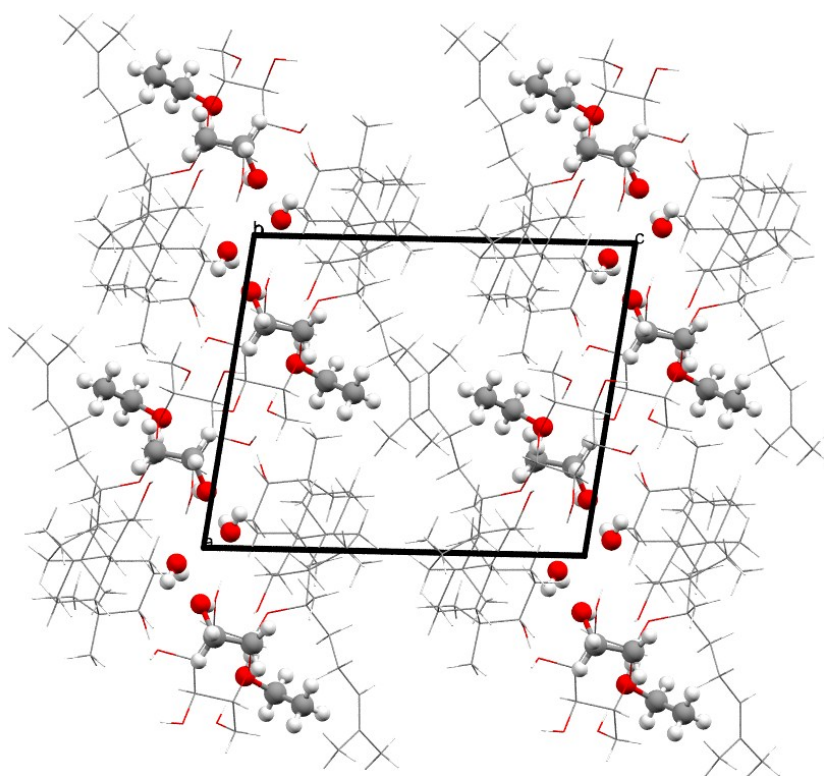

(b)

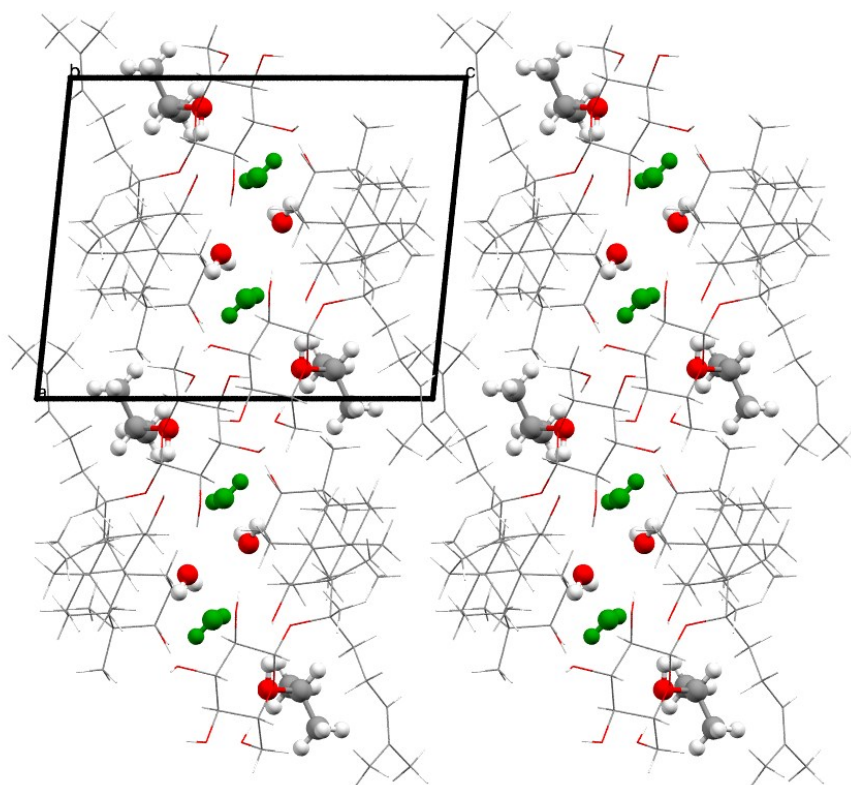

(c)

Fig. S8 crystal packing of type 2 solvates: (a)  $S_{MeW}$ , (b)  $S_{EtW}$  and (c)  $S_{iPrW}$ , some of water molecule (green) occupied the channel of  $S_{iPrW}$  structure.
